# Supplementary material
Source: MDPI journal article supplement (https://www.mdpi.com/2073-4441/14/23/3971)
Supplement: s1 [file s1]

Table S1: Sedimentological dataset

| Beach Samples | >4000 $\mu\text{m}$ | 4000 $\mu\text{m}$ | 2000 $\mu\text{m}$ | 1000 $\mu\text{m}$ | 500 $\mu\text{m}$ | 250 $\mu\text{m}$ | 125 $\mu\text{m}$ | 63 $\mu\text{m}$ | 32 $\mu\text{m}$ | 16 $\mu\text{m}$ | 8 $\mu\text{m}$ | %CaCO <sub>3</sub> |
|---------------|---------------------|--------------------|--------------------|--------------------|-------------------|-------------------|-------------------|------------------|------------------|------------------|-----------------|--------------------|
| OR46SS        | 0                   | 0                  | 0.08               | 28.42              | 69.79             | 1.7               | 0.01              | 0                | 0                | 0                | 0               | 0.0                |
| OR50BK        | 0                   | 0.05               | 0.38               | 23.97              | 72.4              | 3.09              | 0.09              | 0.02             | 0                | 0                | 0               | 0.0                |
| OR72SS        | 0                   | 0                  | 0.02               | 16.03              | 82.94             | 1.01              | 0                 | 0                | 0                | 0                | 0               | 0.0                |
| OR76BK        | 0                   | 0.32               | 0.55               | 23.18              | 69.3              | 6.65              | 0.01              | 0                | 0                | 0                | 0               | 0.0                |
| OR76SS        | 0                   | 0                  | 0.92               | 25.28              | 68.37             | 5.32              | 0.09              | 0.03             | 0                | 0                | 0               | 0.0                |
| OR78BK        | 0                   | 2.69               | 1.15               | 28.09              | 67.39             | 0.68              | 0                 | 0                | 0                | 0                | 0               | 0.0                |
| ORN17BT       | 0                   | 0                  | 0.02               | 1.6                | 72.17             | 25.51             | 0.69              | 0.02             | 0                | 0                | 0               | 48.0               |
| ORArb1SE      | 0                   | 0                  | 0.6                | 15.78              | 40.76             | 33.18             | 9.37              | 0.31             | 0                | 0                | 0               | 5.0                |
| ORArb1BT      | 0                   | 0                  | 0.11               | 25.46              | 62.94             | 8.36              | 2.93              | 0.19             | 0                | 0                | 0               | 2.0                |
| ORArb2BT      | 0                   | 0                  | 0.11               | 2.41               | 65.03             | 29.06             | 3.28              | 0.07             | 0                | 0                | 0               | 3.0                |
| ORArb3BT      | 0                   | 0                  | 0.09               | 6.3                | 69.3              | 17.15             | 6.79              | 0.35             | 0                | 0                | 0               | 1.0                |
| ORArb5SS      | 0                   | 0.28               | 0.39               | 15.33              | 36.27             | 16.42             | 27.88             | 3.43             | 0                | 0                | 0               | 11.0               |
| ORArb2SS      | 0                   | 0                  | 4.12               | 14.84              | 22.55             | 37.79             | 19.02             | 1.59             | 0                | 0                | 0               | 1.0                |
| ORArb9BT      | 0                   | 0                  | 1.78               | 42.33              | 19.55             | 19.02             | 16.37             | 0.95             | 0                | 0                | 0               | 1.0                |
| ORArb7SE      | 0                   | 0                  | 1.44               | 5.86               | 23.5              | 30                | 35.54             | 3.65             | 0                | 0                | 0               | 14.0               |
| OR78SS        | 0                   | 0.16               | 22.34              | 35.53              | 12.36             | 22.87             | 6.23              | 0.52             | 0                | 0                | 0               | 0.0                |
| ISATR6BK      | 0                   | 0.25               | 3.58               | 28.39              | 37.51             | 25.45             | 4.48              | 0.35             | 0                | 0                | 0               | 51.0               |
| ISATR4BK      | 0                   | 0.21               | 2.72               | 31.17              | 41.21             | 20.88             | 3.68              | 0.13             | 0                | 0                | 0               | 48.0               |
| ISATR2BK      | 0                   | 0.45               | 5                  | 8.92               | 27.17             | 47.02             | 11.36             | 0.07             | 0                | 0                | 0               | 42.0               |
| ISATR1BK      | 0                   | 4.49               | 19.92              | 24.91              | 25.24             | 22.42             | 3                 | 0.03             | 0                | 0                | 0               | 43.0               |
| ISATR3BK      | 0                   | 0.32               | 2.65               | 14.23              | 41.25             | 34.43             | 7.02              | 0.1              | 0                | 0                | 0               | 51.0               |
| MLSNBT        | 0                   | 0.1                | 3.67               | 45.71              | 39.01             | 10.16             | 1.34              | 0.02             | 0                | 0                | 0               | 55.0               |
| MLNBT         | 0                   | 0.04               | 2.81               | 17.65              | 59.21             | 20.19             | 0.11              | 0                | 0                | 0                | 0               | 65.0               |
| MLSSBT        | 0                   | 1.64               | 4.11               | 15.59              | 45.95             | 29.08             | 3.56              | 0.06             | 0                | 0                | 0               | 66.0               |
| MLNCBK        | 0                   | 0.36               | 1.25               | 9.4                | 37.46             | 40.1              | 11.25             | 0.18             | 0                | 0                | 0               | 69.0               |
| SRTNBT        | 0                   | 0                  | 0.04               | 12.97              | 63.54             | 16.33             | 7.06              | 0.06             | 0                | 0                | 0               | 66.0               |

|                |   |      |       |       |       |       |       |       |       |      |   |      |
|----------------|---|------|-------|-------|-------|-------|-------|-------|-------|------|---|------|
| SRTCBT         | 0 | 0    | 0.07  | 61.56 | 34.81 | 2.28  | 1.28  | 0     | 0     | 0    | 0 | 43.0 |
| PZCSS          | 0 | 0.02 | 0.03  | 0.62  | 60.14 | 38.56 | 0.62  | 0.01  | 0     | 0    | 0 | 33.0 |
| PZINBT         | 0 | 0.04 | 0.16  | 4     | 61.61 | 16.81 | 17.13 | 0.25  | 0     | 0    | 0 | 27.0 |
| SG-45A         | 0 | 0.58 | 7.01  | 29.19 | 34.53 | 25.88 | 2.82  | 0     | 0     | 0    | 0 | 46.0 |
| SG-A5          | 0 | 0.15 | 0.58  | 19.84 | 57.63 | 20.47 | 1.32  | 0.01  | 0     | 0    | 0 | 30.0 |
| SG-A6          | 0 | 0    | 1.24  | 36.85 | 39.81 | 20.18 | 1.91  | 0     | 0     | 0    | 0 | 41.0 |
| SG-B6          | 0 | 1.2  | 0.93  | 12.68 | 43.87 | 35.44 | 5.87  | 0.02  | 0     | 0    | 0 | 61.0 |
| SG-B7          | 0 | 0.05 | 1.62  | 25.96 | 35.75 | 29.64 | 6.97  | 0     | 0     | 0    | 0 | 48.0 |
| SG-D5          | 0 | 0.15 | 0.65  | 17.51 | 66.84 | 14.09 | 0.76  | 0     | 0     | 0    | 0 | 23.0 |
| SG-C5          | 0 | 2.9  | 12.76 | 38.01 | 31.75 | 12.01 | 2.49  | 0.07  | 0     | 0    | 0 | 27.0 |
| SG-D6          | 0 | 0.1  | 2.52  | 35.9  | 38.88 | 19.52 | 3.08  | 0     | 0     | 0    | 0 | 39.0 |
| SG-Sot Tor Bat | 0 | 0.13 | 1.96  | 35.74 | 56    | 5.79  | 0.39  | 0     | 0     | 0    | 0 | 22.0 |
| ma6a           | 0 | 0.03 | 4.51  | 18.43 | 41.24 | 15.27 | 13.6  | 5.37  | 1.51  | 0.04 | 0 | 0.0  |
| ma7a           | 0 | 0    | 1.88  | 6.55  | 43.42 | 22.05 | 17.83 | 6.54  | 1.69  | 0.04 | 0 | 0.0  |
| ma7b           | 0 | 0.02 | 6.77  | 8.67  | 40.82 | 15.82 | 17.05 | 8.19  | 2.57  | 0.08 | 0 | 0.0  |
| OR84SS         | 0 | 0.02 | 0.04  | 0.24  | 1.77  | 31.06 | 65.07 | 1.78  | 0     | 0    | 0 | 0.0  |
| OR62BK         | 0 | 0    | 0.02  | 0.34  | 0.68  | 31.72 | 66.48 | 0.76  | 0     | 0    | 0 | 0.0  |
| ORN26SS        | 0 | 0    | 0.15  | 0.26  | 4.59  | 33.74 | 43.32 | 15.19 | 2.74  | 0    | 0 | 69.0 |
| ORN18SS        | 0 | 0.03 | 0.48  | 2.56  | 24    | 33.11 | 17.86 | 17.74 | 4.21  | 0    | 0 | 70.0 |
| ORN17SS        | 0 | 0    | 0.14  | 0.71  | 8.17  | 18.27 | 18.46 | 42.19 | 12.06 | 0    | 0 | 74.0 |
| ORArb1SS       | 0 | 0    | 0.15  | 5.34  | 8     | 19.9  | 55.4  | 11.22 | 0     | 0    | 0 | 4.0  |
| ORArb3SS       | 0 | 0    | 0.25  | 0.55  | 0.7   | 8.8   | 78.16 | 11.54 | 0     | 0    | 0 | 8.0  |
| ORArb4SS       | 0 | 0.18 | 0.4   | 6.45  | 11.97 | 20.6  | 55.63 | 4.78  | 0     | 0    | 0 | 5.0  |
| ORArb6SS       | 0 | 0    | 0.18  | 0.69  | 2.75  | 20.11 | 65.33 | 10.94 | 0     | 0    | 0 | 6.0  |
| ORArb6SE       | 0 | 0    | 0     | 0.13  | 0.3   | 13.2  | 79.4  | 6.97  | 0     | 0    | 0 | 6.0  |
| ORArb6BT       | 0 | 0    | 0.44  | 1.39  | 3.27  | 6.11  | 59.28 | 29.5  | 0     | 0    | 0 | 23.0 |
| ORArb7SS       | 0 | 0.77 | 1.32  | 1.98  | 1.51  | 4.15  | 75.93 | 14.34 | 0     | 0    | 0 | 24.0 |
| ORArb7BT       | 0 | 0.08 | 0.66  | 1.8   | 7.97  | 14.38 | 66.06 | 9.05  | 0     | 0    | 0 | 7.0  |
| ORArb9SS       | 0 | 0.91 | 5.95  | 10.1  | 5.03  | 13.43 | 47.96 | 16.61 | 0     | 0    | 0 | 2.0  |
| MLNCBT         | 0 | 0.24 | 0.48  | 2.78  | 7.17  | 28.79 | 57.47 | 3.07  | 0     | 0    | 0 | 67.0 |

|          |      |      |      |      |       |       |       |       |       |      |      |      |
|----------|------|------|------|------|-------|-------|-------|-------|-------|------|------|------|
| MLNNSS   | 0    | 0.43 | 1.27 | 3.82 | 11.32 | 34.7  | 46.32 | 2.14  | 0     | 0    | 0    | 63.0 |
| MLNNBK   | 0    | 0    | 0.07 | 0.08 | 3     | 42.68 | 53.81 | 0.35  | 0     | 0    | 0    | 57.0 |
| SESCSSS  | 0    | 0.44 | 0.84 | 1.19 | 1.96  | 10.65 | 83.54 | 1.37  | 0     | 0    | 0    | 27.0 |
| SESCNBK  | 0    | 0    | 0    | 0.01 | 0.04  | 3.71  | 95.07 | 1.17  | 0     | 0    | 0    | 43.0 |
| SESCNSS  | 0    | 0    | 0.23 | 1.05 | 3.72  | 12.41 | 81.87 | 0.72  | 0     | 0    | 0    | 27.0 |
| SESCSBT  | 0    | 0    | 0    | 0.02 | 0.05  | 4.68  | 93.23 | 2.02  | 0     | 0    | 0    | 17.0 |
| SESCNBT  | 0    | 0    | 0.01 | 0.1  | 0.48  | 4.77  | 92.05 | 2.59  | 0     | 0    | 0    | 2.0  |
| SESCSBK  | 0    | 0.88 | 2.24 | 3.51 | 4.76  | 11.65 | 75.28 | 1.68  | 0     | 0    | 0    | 35.0 |
| SRTNBK   | 0    | 0    | 0    | 0.02 | 0.01  | 2.05  | 96.47 | 1.45  | 0     | 0    | 0    | 53.0 |
| SRTSBT   | 0    | 0    | 0.05 | 0.26 | 1.63  | 14.09 | 83.32 | 0.66  | 0     | 0    | 0    | 72.0 |
| SRTC BK  | 0    | 0.14 | 0.05 | 0.23 | 0.64  | 7.3   | 89.87 | 1.77  | 0     | 0    | 0    | 34.0 |
| SRTNSS   | 0    | 0.08 | 0.35 | 8.61 | 21.65 | 20.39 | 48.14 | 0.78  | 0     | 0    | 0    | 59.0 |
| PZICBK   | 0    | 0    | 0.04 | 2.95 | 17.83 | 16.11 | 61.88 | 1.19  | 0     | 0    | 0    | 36.0 |
| PZISBT   | 0    | 0    | 0.01 | 0.05 | 0.3   | 8.58  | 89.84 | 1.22  | 0     | 0    | 0    | 40.0 |
| PZICBT   | 0    | 0.81 | 3.74 | 8.52 | 26.23 | 9.07  | 50.33 | 1.29  | 0     | 0    | 0    | 36.0 |
| PZINBK   | 0    | 0    | 0    | 0.69 | 20.19 | 21.04 | 57.08 | 0.99  | 0     | 0    | 0    | 30.0 |
| er4e     | 0    | 0.11 | 0.25 | 0.02 | 0.94  | 13.44 | 16.2  | 29.82 | 35.96 | 3.01 | 0.25 | 60.0 |
| er5d     | 0.52 | 2.78 | 4.66 | 0.14 | 0.85  | 14.42 | 16.24 | 25.69 | 31.61 | 2.82 | 0.29 | 52.0 |
| ma9a     | 0    | 0    | 0.04 | 0.18 | 19.94 | 27.64 | 27.67 | 17.44 | 6.89  | 0.18 | 0.01 | 0.0  |
| ma9b     | 0    | 0    | 0.58 | 0.7  | 28.02 | 30.39 | 25.41 | 11.11 | 3.68  | 0.11 | 0.01 | 0.0  |
| ma7d     | 0    | 0    | 0.01 | 0.56 | 20.47 | 24.48 | 28.48 | 17.97 | 7.78  | 0.24 | 0.02 | 69.9 |
| ma9d     | 0    | 0.04 | 0.07 | 0.78 | 24.74 | 26.71 | 30.49 | 13    | 4.03  | 0.14 | 0.01 | 70.4 |
| OR42BK   | 0    | 0.25 | 0.12 | 0.58 | 29.46 | 57.46 | 12.03 | 0.1   | 0     | 0    | 0    | 0.0  |
| OR46BK   | 0    | 0.38 | 0.08 | 1.27 | 52.12 | 42.88 | 3.25  | 0.03  | 0     | 0    | 0    | 0.0  |
| OR86BK   | 0    | 0.06 | 0.08 | 0.4  | 14.41 | 68.83 | 15.99 | 0.23  | 0     | 0    | 0    | 0.0  |
| OR84BK   | 0    | 0    | 0.02 | 0.03 | 2.86  | 69.3  | 27.23 | 0.57  | 0     | 0    | 0    | 0.0  |
| ORN28BT  | 0    | 0.11 | 0.32 | 0.11 | 9.12  | 69.26 | 20.77 | 0.31  | 0     | 0    | 0    | 74.0 |
| ORN34BT  | 0    | 0    | 0.01 | 0.22 | 15.8  | 67.24 | 16.53 | 0.19  | 0     | 0    | 0    | 17.0 |
| ORN18BT  | 0    | 0.06 | 0.22 | 0.77 | 29.67 | 64.95 | 4.32  | 0.02  | 0     | 0    | 0    | 67.0 |
| ORArb2SE | 0    | 0    | 0.07 | 0.38 | 17.98 | 70.44 | 10.73 | 0.4   | 0     | 0    | 0    | 1.0  |
| ORArb3SE | 0    | 0    | 0    | 0.34 | 46.89 | 25.77 | 26.39 | 0.6   | 0     | 0    | 0    | 5.0  |

|          |   |      |      |      |       |       |       |      |   |   |   |       |
|----------|---|------|------|------|-------|-------|-------|------|---|---|---|-------|
| ORArb4SE | 0 | 0    | 0    | 0.74 | 20.79 | 46.3  | 31.76 | 0.41 | 0 | 0 | 0 | 3.0   |
| ORArb4BT | 0 | 0.11 | 0    | 0.36 | 23.41 | 50.95 | 24.88 | 0.29 | 0 | 0 | 0 | 3.0   |
| ORArb5BT | 0 | 0.11 | 0.1  | 4.16 | 50.09 | 32.28 | 12.76 | 0.5  | 0 | 0 | 0 | 7.0   |
| ORArb5SE | 0 | 0.13 | 0.14 | 0.89 | 23.59 | 56.77 | 18.06 | 0.41 | 0 | 0 | 0 | 9.0   |
| ORArb9SE | 0 | 0    | 0    | 4.81 | 30.63 | 38.23 | 25.19 | 1.13 | 0 | 0 | 0 | 3.0   |
| MLSNBK   | 0 | 0.33 | 0.51 | 5.61 | 39.02 | 43.67 | 10.69 | 0.18 | 0 | 0 | 0 | 65.0  |
| MLNSBK   | 0 | 0.14 | 1.07 | 5    | 11.71 | 38.85 | 41.93 | 1.31 | 0 | 0 | 0 | 76.0  |
| MLNSBT   | 0 | 0    | 0    | 1.39 | 11.85 | 52.92 | 33.54 | 0.29 | 0 | 0 | 0 | 64.0  |
| MLSSBK   | 0 | 0.05 | 0.07 | 0.46 | 4.18  | 47.27 | 46.99 | 0.98 | 0 | 0 | 0 | 67.0  |
| SRTCSS   | 0 | 0    | 0    | 0.35 | 32.63 | 31.37 | 35.24 | 0.41 | 0 | 0 | 0 | 60.0  |
| SRTSBK   | 0 | 0    | 0    | 2.05 | 36    | 40.36 | 21.38 | 0.21 | 0 | 0 | 0 | 67.0  |
| PZISSS   | 0 | 0    | 0.01 | 0.05 | 19.67 | 49.22 | 30.98 | 0.08 | 0 | 0 | 0 | 29.0  |
| PZISBK   | 0 | 0    | 0    | 0.36 | 56.32 | 28.09 | 15    | 0.23 | 0 | 0 | 0 | 27.0  |
| PZINSS   | 0 | 0.01 | 0.5  | 1.82 | 37.06 | 57.42 | 3.17  | 0.01 | 0 | 0 | 0 | 33.0  |
| SG-A1    | 0 | 0    | 0    | 0.01 | 3.46  | 58.87 | 37.54 | 0.12 | 0 | 0 | 0 | 84.0  |
| SG-A2    | 0 | 0.03 | 0.03 | 0.04 | 11.69 | 63.74 | 24.36 | 0.11 | 0 | 0 | 0 | 78.0  |
| SG-B1    | 0 | 0    | 0.07 | 0.11 | 9.22  | 66.32 | 24.11 | 0.18 | 0 | 0 | 0 | 73.0  |
| SG-B2    | 0 | 0.02 | 0.04 | 0.65 | 19.64 | 57.51 | 21.82 | 0.32 | 0 | 0 | 0 | 46.0  |
| SG-B3    | 0 | 0    | 0.02 | 0.12 | 6.4   | 55.46 | 37.17 | 0.84 | 0 | 0 | 0 | 69.0  |
| SG-C2    | 0 | 0.05 | 0.05 | 1.5  | 33.93 | 50.11 | 14.2  | 0.16 | 0 | 0 | 0 | 78.0  |
| SG-C3    | 0 | 0    | 0.04 | 1.63 | 30.69 | 56.15 | 11.49 | 0    | 0 | 0 | 0 | 100.0 |
| SG-D3    | 0 | 0    | 0.02 | 2.88 | 27.91 | 54.38 | 14.69 | 0.12 | 0 | 0 | 0 | 86.0  |
| SG-D4    | 0 | 0    | 0    | 3.12 | 40.42 | 52.14 | 4.32  | 0    | 0 | 0 | 0 | 73.0  |
| SG-A3    | 0 | 0    | 0    | 0    | 4.71  | 67.65 | 27.61 | 0.03 | 0 | 0 | 0 | 67.0  |
| SG-A4    | 0 | 0    | 0.02 | 0.03 | 2.86  | 58.14 | 38.84 | 0.12 | 0 | 0 | 0 | 70.0  |
| SG-B4    | 0 | 0    | 0.03 | 0.98 | 37.72 | 50.17 | 10.98 | 0.1  | 0 | 0 | 0 | 69.0  |
| SG-B5    | 0 | 0    | 0    | 0.05 | 16.68 | 64.47 | 18.61 | 0.19 | 0 | 0 | 0 | 82.0  |
| SG-C4    | 0 | 0    | 0    | 1.25 | 42.24 | 49.53 | 6.97  | 0.02 | 0 | 0 | 0 | 78.0  |
| SG-D2    | 0 | 0    | 0    | 0.32 | 23.2  | 58.74 | 17.69 | 0.05 | 0 | 0 | 0 | 76.0  |
| SG-45B   | 0 | 0    | 0.01 | 1.38 | 19.43 | 61.98 | 17.1  | 0.1  | 0 | 0 | 0 | 74.0  |

|                       |       |       |       |       |       |       |       |       |       |      |      |      |
|-----------------------|-------|-------|-------|-------|-------|-------|-------|-------|-------|------|------|------|
| SG-Sot Tor<br>Pied Du | 0     | 0     | 0.09  | 0.71  | 27.51 | 61.74 | 9.86  | 0.09  | 0     | 0    | 0    | 71.0 |
| OR54SS                | 0     | 6.29  | 55.95 | 12.81 | 4.55  | 11.26 | 6.96  | 2.18  | 0     | 0    | 0    | 0.0  |
| OR68BK                | 0     | 1.3   | 50.46 | 37.32 | 5.5   | 3.51  | 1.03  | 0.88  | 0     | 0    | 0    | 0.0  |
| MLNCSS                | 0     | 18.18 | 44.94 | 30.31 | 3.94  | 1.02  | 1.54  | 0.06  | 0     | 0    | 0    | 67.0 |
| er1a                  | 8.89  | 60.26 | 30.83 | 0.01  | 0     | 0     | 0     | 0     | 0     | 0    | 0    | 0.0  |
| er1b                  | 4.64  | 32.57 | 61.96 | 0.79  | 0.05  | 0     | 0     | 0     | 0     | 0    | 0    | 0.0  |
| er1c                  | 3.59  | 21.25 | 70.99 | 2.47  | 0.91  | 0.25  | 0.28  | 0.16  | 0.09  | 0    | 0    | 76.0 |
| er2a                  | 0.3   | 3.66  | 85.21 | 2.24  | 1.28  | 2.23  | 2.02  | 1.8   | 1.2   | 0.06 | 0    | 0.0  |
| er2b                  | 2.49  | 8.17  | 73.6  | 2.54  | 1.8   | 2.63  | 2.9   | 3.12  | 2.58  | 0.16 | 0.01 | 0.0  |
| er2c                  | 0.89  | 10.67 | 73.54 | 5.78  | 1.07  | 2.04  | 2.17  | 2.03  | 1.69  | 0.11 | 0.01 | 6.0  |
| er3a                  | 0.11  | 7.12  | 78.29 | 0.89  | 1.42  | 2.9   | 2.86  | 3.27  | 2.97  | 0.16 | 0.01 | 0.0  |
| er3b                  | 0.03  | 0.68  | 61.17 | 3.6   | 4.2   | 7.71  | 8.17  | 7.94  | 6.13  | 0.34 | 0.02 | 0.0  |
| er3c                  | 0.22  | 1.48  | 59.46 | 10.03 | 2.49  | 5.83  | 7.02  | 7.18  | 5.85  | 0.41 | 0.03 | 19.0 |
| er4a                  | 0     | 0.14  | 64.9  | 7.2   | 2.74  | 7.13  | 6.7   | 6.67  | 4.3   | 0.21 | 0.01 | 0.0  |
| er4b                  | 0     | 0.23  | 56.94 | 3.97  | 3.14  | 9.83  | 7.54  | 9.91  | 7.95  | 0.47 | 0.04 | 0.0  |
| er4c                  | 0     | 0.4   | 50.4  | 10.52 | 5.07  | 8.74  | 10.32 | 8.39  | 5.85  | 0.29 | 0.02 | 25.0 |
| er5a                  | 0.25  | 2.71  | 59.01 | 4.43  | 2.73  | 8.57  | 9.31  | 8.21  | 4.56  | 0.21 | 0.01 | 0.0  |
| er5b                  | 0     | 0.51  | 90.19 | 0.33  | 0.65  | 2.13  | 2.15  | 2.02  | 1.89  | 0.13 | 0.01 | 0.0  |
| er5c                  | 0.14  | 2.15  | 59.43 | 2.89  | 2.58  | 6.98  | 6.05  | 9.04  | 9.95  | 0.74 | 0.06 | 22.0 |
| er6a                  | 0     | 0.41  | 58.38 | 11.61 | 3.16  | 6.81  | 6.63  | 7     | 5.68  | 0.29 | 0.02 | 0.0  |
| er6b                  | 0     | 0.36  | 39.47 | 4.18  | 2.17  | 10.55 | 11.55 | 15.38 | 15.24 | 1.01 | 0.08 | 0.0  |
| er6c                  | 0.07  | 1.39  | 63.7  | 2.29  | 4.32  | 6.82  | 7.14  | 7.87  | 6.04  | 0.33 | 0.03 | 21.0 |
| er7a                  | 0.63  | 4.06  | 76.26 | 11.42 | 0.93  | 1.83  | 2.08  | 1.74  | 1     | 0.05 | 0    | 0.0  |
| er7b                  | 0.11  | 0     | 88.95 | 1.67  | 1.47  | 2.46  | 2.71  | 1.77  | 0.84  | 0.03 | 0    | 0.0  |
| er7c                  | 0.05  | 2.08  | 56.36 | 4.41  | 4.88  | 8.94  | 9.13  | 8.1   | 5.74  | 0.29 | 0.02 | 25.0 |
| er3d                  | 11.05 | 25.5  | 54.88 | 0.28  | 0.41  | 1.46  | 1.77  | 2.29  | 2.19  | 0.17 | 0.01 | 6.0  |
| er4d                  | 7.91  | 9.65  | 13.45 | 0.33  | 2.05  | 10.26 | 10.78 | 19.51 | 23.97 | 1.93 | 0.17 | 60.0 |
| er7d                  | 1.71  | 15.91 | 36.87 | 0.99  | 2.73  | 7.33  | 9.9   | 12.36 | 11.26 | 0.87 | 0.07 | 29.0 |
| ar0a                  | 2.13  | 4.56  | 85.87 | 5.38  | 0.56  | 0.39  | 0.45  | 0.36  | 0.27  | 0.02 | 0    | 0.0  |
| ar0b                  | 0     | 0     | 78.16 | 15.69 | 3.63  | 0.8   | 0.94  | 0.48  | 0.28  | 0.02 | 0    | 0.0  |

|         |       |       |       |       |       |      |      |      |      |      |   |      |
|---------|-------|-------|-------|-------|-------|------|------|------|------|------|---|------|
| ar0c    | 0.07  | 0.3   | 89.23 | 10.15 | 0.26  | 0    | 0    | 0    | 0    | 0    | 0 | 0.0  |
| ar1a    | 0.53  | 0.69  | 59.83 | 36.7  | 1.22  | 0.23 | 0.37 | 0.24 | 0.17 | 0.01 | 0 | 0.0  |
| ar1b    | 0     | 0.05  | 53.5  | 40.56 | 2.83  | 0.95 | 1.13 | 0.63 | 0.31 | 0.02 | 0 | 0.0  |
| ar1c    | 0.13  | 0.63  | 83.37 | 15.61 | 0.25  | 0    | 0    | 0    | 0    | 0    | 0 | 0.0  |
| ar2a    | 0     | 0.19  | 82.81 | 16.23 | 0.58  | 0.06 | 0.09 | 0.03 | 0.01 | 0    | 0 | 0.0  |
| ar2b    | 0.07  | 1.22  | 74.1  | 24.57 | 0.04  | 0    | 0    | 0    | 0    | 0    | 0 | 0.0  |
| ar2c    | 0     | 0.08  | 85.06 | 14.8  | 0.06  | 0    | 0    | 0    | 0    | 0    | 0 | 0.0  |
| ar3a    | 3.93  | 15.21 | 76.16 | 4.68  | 0.02  | 0    | 0    | 0    | 0    | 0    | 0 | 0.0  |
| ar3b    | 0.14  | 3.91  | 74.37 | 21.52 | 0.07  | 0    | 0    | 0    | 0    | 0    | 0 | 0.0  |
| ar3c    | 0     | 0.59  | 98.97 | 0.26  | 0.18  | 0    | 0    | 0    | 0    | 0    | 0 | 0.0  |
| ar0d    | 15.79 | 10.4  | 68.18 | 4.99  | 0.63  | 0    | 0    | 0    | 0    | 0    | 0 | 0.0  |
| ar1d    | 16.2  | 6.58  | 53.71 | 21.96 | 1.54  | 0    | 0    | 0    | 0    | 0    | 0 | 0.0  |
| ar2d    | 2.7   | 6.28  | 84.12 | 6.75  | 0.14  | 0    | 0    | 0    | 0    | 0    | 0 | 0.0  |
| ma1a    | 2.65  | 16.24 | 80.77 | 0.28  | 0.05  | 0    | 0    | 0    | 0    | 0    | 0 | 0.0  |
| ma1b    | 0.37  | 6.72  | 92.14 | 0.74  | 0.03  | 0    | 0    | 0    | 0    | 0    | 0 | 0.0  |
| ma1c    | 0.06  | 1.63  | 97.01 | 1.19  | 0.11  | 0    | 0    | 0    | 0    | 0    | 0 | 0.1  |
| ma2a    | 5.61  | 8.84  | 54    | 26.48 | 1.71  | 1.27 | 1.16 | 0.67 | 0.27 | 0.01 | 0 | 0.0  |
| ma2b    | 0     | 0.53  | 75.65 | 23.79 | 0.02  | 0    | 0    | 0    | 0    | 0    | 0 | 0.0  |
| ma2c    | 0     | 0.07  | 71.76 | 28.05 | 0.12  | 0    | 0    | 0    | 0    | 0    | 0 | 0.1  |
| ma3c    | 0     | 0.29  | 66.59 | 31.65 | 1.18  | 0.12 | 0.12 | 0.03 | 0.01 | 0    | 0 | 0.3  |
| ma5c    | 0.37  | 0.73  | 71.99 | 25.33 | 1.1   | 0.19 | 0.21 | 0.07 | 0.02 | 0    | 0 | 2.9  |
| ma8c    | 0.03  | 0.57  | 85.19 | 12.93 | 0.6   | 0.24 | 0.26 | 0.13 | 0.04 | 0    | 0 | 3.0  |
| OR54BK  | 0     | 1.56  | 8.15  | 72.67 | 17.6  | 0.01 | 0    | 0    | 0    | 0    | 0 | 0.0  |
| OR82BK  | 0     | 0.4   | 0.86  | 68.23 | 30.24 | 0.23 | 0.02 | 0.01 | 0    | 0    | 0 | 0.0  |
| OR68SS  | 0     | 0     | 0.58  | 84.75 | 14.64 | 0.03 | 0    | 0    | 0    | 0    | 0 | 0.0  |
| OR62SS  | 0     | 1.12  | 1.33  | 49.16 | 47.18 | 0.8  | 0.37 | 0.03 | 0    | 0    | 0 | 0.0  |
| OR72BK  | 0     | 0.35  | 4.89  | 80.68 | 13.99 | 0.03 | 0.04 | 0.03 | 0    | 0    | 0 | 0.0  |
| OR86SS  | 0     | 4.77  | 13.07 | 50.76 | 31.04 | 0.32 | 0.04 | 0.01 | 0    | 0    | 0 | 0.0  |
| OR82SS  | 0     | 7.41  | 12.22 | 60.35 | 19.84 | 0.12 | 0.06 | 0    | 0    | 0    | 0 | 0.0  |
| OR50SS  | 0     | 1.2   | 30.86 | 60.35 | 6.81  | 0.73 | 0.05 | 0    | 0    | 0    | 0 | 0.0  |
| ORN30BT | 0     | 5.59  | 21.49 | 39.04 | 31.43 | 1.95 | 0.42 | 0.09 | 0    | 0    | 0 | 71.0 |

|               |      |      |       |       |       |       |       |      |      |      |      |      |
|---------------|------|------|-------|-------|-------|-------|-------|------|------|------|------|------|
| ORN36BT       | 0    | 4.48 | 28.28 | 27.13 | 10.62 | 13.76 | 14.01 | 1.72 | 0    | 0    | 0    | 15.0 |
| ISATR5BK      | 0    | 1.62 | 26.42 | 54.69 | 14.01 | 3.06  | 0.19  | 0.02 | 0    | 0    | 0    | 47.0 |
| MLSNSS        | 0    | 7.19 | 22.94 | 28.67 | 18.84 | 15.32 | 6.99  | 0.05 | 0    | 0    | 0    | 64.0 |
| ma3a          | 0    | 0.56 | 31.98 | 51.28 | 11.09 | 2.03  | 2.15  | 0.72 | 0.19 | 0.01 | 0    | 0.0  |
| ma3b          | 0    | 0.08 | 23.72 | 71.95 | 3.26  | 0.39  | 0.44  | 0.13 | 0.04 | 0    | 0    | 0.0  |
| ma4a          | 0    | 0.08 | 9.43  | 24.52 | 38.15 | 10.09 | 10.7  | 5.21 | 1.77 | 0.05 | 0    | 0.0  |
| ma4b          | 0    | 0.1  | 11.99 | 47.67 | 25.39 | 5.38  | 6.5   | 2.29 | 0.66 | 0.02 | 0    | 0.0  |
| ma4c          | 0    | 0.16 | 21.58 | 50.79 | 17.62 | 3.95  | 4.19  | 1.34 | 0.38 | 0.01 | 0    | 32.2 |
| ma5a          | 0.25 | 1.17 | 14.98 | 16.18 | 28.31 | 14.4  | 15.3  | 6.94 | 2.38 | 0.1  | 0    | 0.0  |
| ma5b          | 0    | 0    | 7.86  | 41.2  | 32.38 | 6.41  | 7.69  | 3.46 | 0.98 | 0.03 | 0    | 0.0  |
| ma6b          | 0    | 0    | 8.76  | 41.62 | 28.8  | 7.8   | 8.86  | 3.19 | 0.93 | 0.03 | 0    | 0.0  |
| ma6c          | 0    | 0.15 | 36.41 | 36.34 | 14.63 | 5.28  | 4.98  | 1.66 | 0.54 | 0.02 | 0    | 20.4 |
| ma8a          | 0    | 0.14 | 12.65 | 19.73 | 24.54 | 14.66 | 18.46 | 7.52 | 2.22 | 0.07 | 0    | 0.0  |
| ma8b          | 0    | 0.05 | 33.19 | 29.08 | 14.1  | 9.25  | 9.92  | 3.38 | 1    | 0.03 | 0    | 0.0  |
| ma9c          | 0    | 0.02 | 15.47 | 10.67 | 23.53 | 18.81 | 18.32 | 9.71 | 3.35 | 0.11 | 0.01 | 52.8 |
| SSDs Samples  |      |      |       |       |       |       |       |      |      |      |      |      |
| F65-008_04-11 | 0.0  | 4.5  | 10.0  | 14.3  | 29.5  | 34.0  | 6.8   | 1.0  | 0.0  | 0.0  | 0.0  | 28.9 |
| B24           | 0.0  | 0.0  | 0.6   | 3.1   | 29.8  | 47.8  | 18.3  | 0.4  | 0.0  | 0.0  | 0.0  | 35.0 |
| B48           | 0.0  | 8.9  | 8.7   | 14.0  | 27.3  | 32.5  | 8.0   | 0.6  | 0.0  | 0.0  | 0.0  | 18.2 |
| F65-002_0-10  | 0.0  | 0.2  | 1.7   | 27.0  | 53.0  | 16.6  | 1.5   | 0.1  | 0.0  | 0.0  | 0.0  | 6.5  |
| B11           | 0.0  | 7.9  | 9.4   | 35.6  | 35.3  | 10.2  | 1.4   | 0.1  | 0.0  | 0.0  | 0.0  | 9.0  |
| B45           | 0.0  | 2.5  | 8.3   | 30.3  | 47.0  | 6.1   | 4.5   | 1.2  | 0.0  | 0.0  | 0.0  | 32.9 |
| B52           | 0.0  | 11.1 | 11.6  | 23.1  | 34.2  | 16.9  | 2.9   | 0.2  | 0.0  | 0.0  | 0.0  | 3.0  |
| B53           | 0.0  | 14.8 | 3.5   | 23.1  | 44.2  | 8.0   | 5.1   | 1.5  | 0.0  | 0.0  | 0.0  | 13.3 |
| B56           | 0.0  | 1.1  | 3.8   | 10.0  | 65.6  | 17.3  | 2.1   | 0.2  | 0.0  | 0.0  | 0.0  | 60.0 |
| B57           | 0.0  | 0.5  | 3.2   | 22.0  | 55.3  | 16.2  | 2.6   | 0.2  | 0.0  | 0.0  | 0.0  | 64.5 |
| B58bis        | 0.0  | 5.2  | 14.0  | 39.1  | 26.8  | 13.2  | 1.7   | 0.1  | 0.0  | 0.0  | 0.0  | 74.8 |
| B6            | 0.0  | 0.4  | 1.1   | 2.1   | 12.3  | 37.8  | 40.7  | 5.5  | 0.0  | 0.0  | 0.0  | 65.1 |
| B7            | 0.0  | 0.1  | 0.5   | 1.6   | 6.5   | 30.1  | 53.3  | 8.0  | 0.0  | 0.0  | 0.0  | 77.7 |
| B9            | 0.0  | 0.1  | 0.2   | 0.8   | 5.5   | 35.6  | 53.3  | 4.4  | 0.0  | 0.0  | 0.0  | 69.6 |

|               |     |     |     |     |     |      |      |      |     |     |     |       |
|---------------|-----|-----|-----|-----|-----|------|------|------|-----|-----|-----|-------|
| B18           | 0.0 | 0.1 | 1.1 | 2.2 | 7.9 | 29.3 | 50.1 | 9.4  | 0.0 | 0.0 | 0.0 | 59.0  |
| B22           | 0.0 | 0.0 | 0.3 | 0.4 | 4.2 | 33.7 | 57.8 | 3.6  | 0.0 | 0.0 | 0.0 | 29.3  |
| B23           | 0.0 | 0.0 | 0.3 | 1.1 | 5.0 | 34.0 | 56.8 | 2.9  | 0.0 | 0.0 | 0.0 | 41.4  |
| B46           | 0.0 | 0.3 | 0.3 | 1.0 | 4.2 | 37.8 | 49.6 | 6.8  | 0.0 | 0.0 | 0.0 | 24.7  |
| B51           | 0.0 | 0.0 | 0.1 | 0.5 | 6.0 | 35.3 | 50.7 | 7.4  | 0.0 | 0.0 | 0.0 | 67.0  |
| F65-007_03-06 | 0.0 | 0.0 | 0.1 | 0.3 | 2.1 | 13.7 | 56.7 | 27.0 | 0.0 | 0.0 | 0.0 | 99.4  |
| F65-006       | 0.0 | 0.0 | 0.2 | 0.6 | 2.3 | 16.6 | 67.8 | 12.5 | 0.0 | 0.0 | 0.0 | 37.7  |
| B10           | 0.0 | 0.1 | 0.5 | 1.7 | 5.9 | 22.6 | 57.1 | 12.1 | 0.0 | 0.0 | 0.0 | 83.2  |
| B12           | 0.0 | 0.3 | 0.8 | 2.3 | 5.9 | 17.8 | 50.5 | 22.5 | 0.0 | 0.0 | 0.0 | 68.1  |
| B19           | 0.0 | 0.0 | 2.2 | 3.5 | 4.8 | 17.9 | 51.3 | 20.3 | 0.0 | 0.0 | 0.0 | 100.0 |
| B20           | 0.0 | 0.2 | 0.9 | 2.8 | 4.1 | 17.1 | 50.1 | 24.9 | 0.0 | 0.0 | 0.0 | 61.5  |
| B25           | 0.0 | 0.0 | 1.0 | 2.1 | 3.6 | 12.0 | 45.0 | 36.3 | 0.0 | 0.0 | 0.0 | 21.7  |
| B27           | 0.0 | 0.2 | 0.6 | 1.8 | 4.3 | 14.8 | 53.3 | 24.9 | 0.0 | 0.0 | 0.0 | 14.7  |
| B28           | 0.0 | 1.3 | 1.3 | 2.2 | 3.0 | 9.8  | 48.7 | 33.7 | 0.0 | 0.0 | 0.0 | 48.5  |
| B29           | 0.0 | 0.9 | 0.5 | 0.6 | 2.3 | 18.6 | 62.1 | 15.0 | 0.0 | 0.0 | 0.0 | 64.4  |
| B30           | 0.0 | 0.0 | 0.1 | 1.1 | 4.3 | 22.6 | 60.3 | 11.6 | 0.0 | 0.0 | 0.0 | 66.0  |
| B31           | 0.0 | 0.5 | 0.7 | 1.5 | 2.2 | 6.8  | 46.8 | 41.5 | 0.0 | 0.0 | 0.0 | 87.7  |
| B43           | 0.0 | 0.1 | 0.7 | 2.3 | 4.2 | 11.0 | 51.8 | 29.9 | 0.0 | 0.0 | 0.0 | 58.0  |
| B44           | 0.0 | 0.2 | 0.7 | 1.3 | 3.5 | 21.7 | 56.1 | 16.5 | 0.0 | 0.0 | 0.0 | 79.0  |
| B47           | 0.0 | 0.0 | 0.9 | 2.3 | 3.9 | 7.7  | 46.0 | 39.1 | 0.0 | 0.0 | 0.0 | 46.6  |
| B49           | 0.0 | 1.1 | 3.2 | 5.1 | 7.7 | 10.1 | 40.7 | 32.1 | 0.0 | 0.0 | 0.0 | 72.3  |
| B32           | 0.0 | 0.4 | 1.4 | 1.5 | 1.6 | 4.5  | 45.3 | 45.4 | 0.0 | 0.0 | 0.0 | 71.9  |
| B33           | 0.0 | 0.1 | 0.3 | 0.4 | 0.5 | 5.6  | 21.7 | 71.4 | 0.0 | 0.0 | 0.0 | 71.8  |
| B34           | 0.0 | 1.2 | 2.2 | 3.2 | 2.7 | 4.3  | 33.3 | 53.1 | 0.0 | 0.0 | 0.0 | 68.5  |
| B35           | 0.0 | 0.3 | 0.5 | 0.8 | 1.9 | 6.4  | 36.8 | 53.3 | 0.0 | 0.0 | 0.0 | 74.3  |
| B36           | 0.0 | 0.2 | 0.2 | 0.3 | 0.5 | 2.0  | 15.2 | 81.5 | 0.0 | 0.0 | 0.0 | 66.6  |
| B37           | 0.0 | 0.2 | 0.4 | 0.6 | 1.1 | 2.3  | 23.8 | 71.7 | 0.0 | 0.0 | 0.0 | 63.1  |
| B38           | 0.0 | 0.3 | 0.5 | 1.0 | 1.7 | 4.9  | 32.5 | 59.1 | 0.0 | 0.0 | 0.0 | 69.5  |
| B39           | 0.0 | 0.0 | 0.0 | 0.2 | 0.9 | 3.2  | 16.3 | 79.4 | 0.0 | 0.0 | 0.0 | 55.5  |
| B40           | 0.0 | 0.3 | 0.6 | 1.1 | 1.7 | 2.9  | 20.1 | 73.2 | 0.0 | 0.0 | 0.0 | 57.2  |



|             |      |      |      |      |      |      |      |      |     |     |     |      |
|-------------|------|------|------|------|------|------|------|------|-----|-----|-----|------|
| B41         | 0.0  | 0.3  | 0.3  | 0.6  | 1.1  | 3.9  | 28.6 | 65.3 | 0.0 | 0.0 | 0.0 | 77.8 |
| TR 1-10     | 0.0  | 0.0  | 0.0  | 0.0  | 5.9  | 20.0 | 67.4 | 6.7  | 0.0 | 0.0 | 0.0 | 48.0 |
| TR 1-11     | 0.0  | 0.0  | 0.0  | 0.0  | 5.7  | 21.9 | 62.0 | 10.3 | 0.0 | 0.0 | 0.0 | 56.0 |
| TR 2-8      | 0.0  | 0.0  | 0.0  | 0.0  | 7.0  | 32.3 | 55.4 | 5.2  | 0.0 | 0.0 | 0.0 | 50.0 |
| TR 2-9      | 0.0  | 0.0  | 0.0  | 0.0  | 7.1  | 21.5 | 56.8 | 14.5 | 0.0 | 0.0 | 0.0 | 57.0 |
| TR 2-16     | 0.0  | 0.0  | 0.0  | 0.0  | 7.4  | 24.4 | 57.4 | 10.8 | 0.0 | 0.0 | 0.0 | 75.0 |
| TR 2-18     | 0.0  | 0.0  | 0.0  | 0.0  | 7.7  | 28.6 | 53.0 | 10.6 | 0.0 | 0.0 | 0.0 | 84.0 |
| TR 3-8      | 0.0  | 0.0  | 0.0  | 0.0  | 5.5  | 16.5 | 64.5 | 13.4 | 0.0 | 0.0 | 0.0 | 60.0 |
| TR 3-9      | 0.0  | 0.0  | 0.0  | 0.0  | 6.7  | 20.6 | 63.2 | 9.5  | 0.0 | 0.0 | 0.0 | 68.0 |
| TR 3-11     | 0.0  | 0.0  | 0.0  | 0.0  | 5.9  | 20.0 | 64.4 | 9.7  | 0.0 | 0.0 | 0.0 | 73.0 |
| TR 3-15     | 0.0  | 0.0  | 0.0  | 0.0  | 5.8  | 24.0 | 62.1 | 8.1  | 0.0 | 0.0 | 0.0 | 83.0 |
| F65-003_0-3 | 0.0  | 0.0  | 0.5  | 0.8  | 5.5  | 41.9 | 47.5 | 3.8  | 0.0 | 0.0 | 0.0 | 84.5 |
| B8          | 0.0  | 0.1  | 1.0  | 1.9  | 12.2 | 51.1 | 31.8 | 1.9  | 0.0 | 0.0 | 0.0 | 69.9 |
| B17         | 0.0  | 0.0  | 0.4  | 1.2  | 9.8  | 45.2 | 41.1 | 2.3  | 0.0 | 0.0 | 0.0 | 57.1 |
| B26         | 0.0  | 0.0  | 0.3  | 1.3  | 8.6  | 45.4 | 41.6 | 2.8  | 0.0 | 0.0 | 0.0 | 59.5 |
| B55         | 0.0  | 0.0  | 0.1  | 1.9  | 15.2 | 51.1 | 30.5 | 1.1  | 0.0 | 0.0 | 0.0 | 86.1 |
| B50         | 0.0  | 0.7  | 1.6  | 3.6  | 33.5 | 54.9 | 4.6  | 0.9  | 0.0 | 0.0 | 0.0 | 18.0 |
| B54         | 0.0  | 0.1  | 0.4  | 2.7  | 32.2 | 49.0 | 14.9 | 0.6  | 0.0 | 0.0 | 0.0 | 9.4  |
| TR 1-13 b   | 0.0  | 0.0  | 0.0  | 0.0  | 10.0 | 35.9 | 51.3 | 2.8  | 0.0 | 0.0 | 0.0 | 75.0 |
| TR 2-5 b    | 0.0  | 0.0  | 0.0  | 0.0  | 10.7 | 35.3 | 52.9 | 1.1  | 0.0 | 0.0 | 0.0 | 26.0 |
| TR 2-14 b   | 0.0  | 0.0  | 0.0  | 0.0  | 21.5 | 54.0 | 23.8 | 0.5  | 0.0 | 0.0 | 0.0 | 65.0 |
| TR 2-15     | 0.0  | 0.0  | 0.0  | 0.0  | 14.0 | 46.0 | 38.1 | 1.8  | 0.0 | 0.0 | 0.0 | 73.0 |
| B16         | 0.0  | 25.3 | 15.2 | 17.4 | 17.0 | 14.2 | 10.3 | 0.7  | 0.0 | 0.0 | 0.0 | 57.6 |
| B42         | 0.0  | 4.0  | 17.9 | 40.9 | 30.9 | 5.4  | 0.7  | 0.2  | 0.0 | 0.0 | 0.0 | 6.0  |
| B58         | 0.0  | 33.5 | 11.3 | 29.4 | 18.1 | 6.9  | 0.7  | 0.1  | 0.0 | 0.0 | 0.0 | 61.0 |
| TR 1-1 b    | 55.8 | 14.7 | 3.9  | 2.2  | 8.5  | 7.1  | 4.8  | 1.9  | 0.9 | 0.1 | 0.0 | 0.0  |
| TR 1-5 b    | 79.2 | 1.3  | 1.9  | 2.0  | 6.5  | 3.9  | 3.1  | 1.4  | 0.6 | 0.1 | 0.0 | 0.0  |
| TR 1-6      | 36.0 | 1.6  | 1.3  | 4.2  | 24.6 | 12.2 | 12.0 | 5.2  | 2.6 | 0.4 | 0.0 | 0.0  |
| TR 1-13 a   | 61.6 | 1.1  | 1.0  | 1.3  | 3.4  | 10.8 | 10.8 | 4.4  | 4.5 | 1.1 | 0.1 | 0.0  |
| TR 2-4      | 71.4 | 2.2  | 3.7  | 2.5  | 6.4  | 4.4  | 5.2  | 2.3  | 1.5 | 0.2 | 0.0 | 0.0  |
| TR 3-4 a    | 73.0 | 1.8  | 2.1  | 4.1  | 7.6  | 4.1  | 4.0  | 1.6  | 1.4 | 0.3 | 0.0 | 0.0  |

|           |      |      |      |      |      |      |     |     |     |     |     |     |
|-----------|------|------|------|------|------|------|-----|-----|-----|-----|-----|-----|
| TR 1-2    | 4.5  | 21.8 | 22.5 | 27.5 | 16.2 | 2.4  | 3.0 | 1.2 | 0.8 | 0.2 | 0.0 | 0.0 |
| TR 1-8 b  | 6.5  | 38.8 | 39.4 | 12.8 | 1.7  | 0.3  | 0.3 | 0.1 | 0.1 | 0.0 | 0.0 | 0.0 |
| TR 1-9    | 31.6 | 26.6 | 12.9 | 7.2  | 12.9 | 3.2  | 3.3 | 1.5 | 0.8 | 0.1 | 0.0 | 0.0 |
| TR 2-2    | 22.4 | 17.7 | 36.5 | 14.4 | 4.6  | 1.5  | 1.5 | 0.6 | 0.6 | 0.1 | 0.0 | 0.0 |
| TR 2-3    | 14.6 | 34.7 | 22.5 | 12.4 | 8.7  | 2.5  | 2.4 | 1.2 | 0.7 | 0.1 | 0.0 | 0.0 |
| TR 2-7 b  | 15.7 | 12.7 | 19.0 | 22.4 | 22.8 | 2.8  | 2.7 | 1.1 | 0.7 | 0.1 | 0.0 | 0.0 |
| TR 2-11   | 7.6  | 15.2 | 28.3 | 23.6 | 19.5 | 1.9  | 2.2 | 1.0 | 0.7 | 0.1 | 0.0 | 0.0 |
| TR 3-2    | 10.5 | 16.5 | 30.9 | 26.4 | 12.4 | 1.2  | 1.1 | 0.6 | 0.4 | 0.1 | 0.0 | 0.0 |
| TR 3-7    | 32.5 | 13.7 | 23.1 | 15.8 | 12.4 | 0.9  | 0.8 | 0.4 | 0.3 | 0.1 | 0.0 | 0.0 |
| TR 1-4    | 21.2 | 6.6  | 6.9  | 16.4 | 33.8 | 6.1  | 5.3 | 2.2 | 1.2 | 0.3 | 0.0 | 0.0 |
| TR 1-12   | 16.6 | 3.4  | 9.9  | 37.9 | 21.0 | 4.4  | 4.0 | 1.5 | 1.0 | 0.2 | 0.0 | 0.0 |
| TR 1-14 a | 11.7 | 8.8  | 7.6  | 30.5 | 27.7 | 4.7  | 5.0 | 2.3 | 1.5 | 0.3 | 0.0 | 0.0 |
| TR 1-15   | 3.5  | 7.2  | 6.8  | 7.7  | 53.5 | 7.9  | 7.7 | 3.3 | 2.1 | 0.4 | 0.0 | 0.0 |
| TR 1-16   | 1.0  | 0.3  | 2.8  | 28.4 | 42.7 | 10.6 | 8.6 | 3.4 | 2.0 | 0.3 | 0.0 | 0.0 |
| TR 2-1    | 0.0  | 0.6  | 5.8  | 24.1 | 51.1 | 6.1  | 6.8 | 2.9 | 2.1 | 0.5 | 0.0 | 0.0 |
| TR 2-6    | 4.9  | 9.7  | 21.6 | 27.8 | 27.2 | 3.1  | 3.4 | 1.4 | 0.7 | 0.1 | 0.0 | 0.0 |
| TR 2-7 a  | 0.7  | 1.6  | 12.0 | 28.9 | 35.5 | 7.7  | 7.3 | 3.4 | 2.3 | 0.4 | 0.0 | 0.0 |
| TR 2-10   | 3.5  | 11.1 | 22.6 | 30.6 | 24.0 | 2.7  | 3.2 | 1.3 | 0.8 | 0.2 | 0.0 | 0.0 |
| TR 2-13 a | 30.9 | 3.2  | 7.4  | 25.7 | 19.7 | 4.9  | 4.6 | 2.1 | 1.3 | 0.2 | 0.0 | 0.0 |
| TR 2-14 a | 5.4  | 3.7  | 14.2 | 31.1 | 37.1 | 3.3  | 3.2 | 1.2 | 0.7 | 0.1 | 0.0 | 0.0 |
| TR 3-10   | 4.8  | 9.1  | 14.3 | 18.5 | 40.3 | 5.7  | 4.2 | 1.7 | 1.1 | 0.2 | 0.0 | 0.0 |
| TR 3-12   | 5.3  | 4.1  | 3.6  | 16.2 | 58.7 | 4.8  | 4.1 | 1.8 | 1.2 | 0.2 | 0.0 | 0.0 |
| TR 3-13   | 5.0  | 8.4  | 19.8 | 34.3 | 24.3 | 3.8  | 2.7 | 1.0 | 0.6 | 0.1 | 0.0 | 0.0 |
| TR 3-14   | 2.5  | 2.6  | 23.5 | 40.5 | 24.8 | 2.6  | 2.1 | 0.8 | 0.5 | 0.1 | 0.0 | 0.0 |
| TR 4-2    | 1.2  | 0.6  | 10.0 | 43.5 | 27.3 | 5.9  | 6.0 | 3.0 | 2.1 | 0.4 | 0.0 | 0.0 |
